# Supplementary material for: Comparison of brain connectomes by MRI and genomics and its implication in Alzheimer’s disease
Source: Springer Nature journal article supplement (doi:10.1186/s12916-019-1488-1), 2020-02-06

## Additional File 1

**Additional File 1: Figure S1. Probability of tract reaching brain regions.** Reach probability of tract connecting to 82 ROIs are visualized in **A)** heatmap and **B)** barplots for AD-associated tracts that have been replicated in two independent cohorts in the current study.

**Additional File 1: Figure S2. Reach probability distribution.** The distribution of reach probability is extremely heavy tailed and large proportion of reach probability measures are low. **A)** Histogram demonstrates this extreme value distribution. The orange dashed vertical line is reach probability of 0.002 and it cuts the distribution. This threshold is a reflection point based on Empirical Cumulative Distribution Function of reach probabilities. **B)** Empirical Cumulative Distribution Function of reaching probability below 5% is plotted. The orange dashed vertical line is reach probability of 0.002 and is an approximal reflection point.

**Additional File 1: Figure S3. Pathway interaction analysis and results.** Interaction between TTC genes by brain ROIs at the molecular pathways were examined. **A)** For a pair of ROIs, pathways significantly over-represented by TTC genes were binarized for each ROIs. The two binarized vectors for a ROI pair was transformed to adjacency matrix and this defines pathway interaction between a ROI pair. This was repeated for all 136 ROI pairs. **B)** The 136 adjacency matrices were grouped by white matter connection definition where not-tract-bound (72 ROI pairs), tract-bound (64 ROI pairs), and AD-tract-bound (34 ROI pairs). The heatmaps display proportion of pathway interactions normalized by number of ROI pairs in each group for not-tract-bound (left), tract-bound (middle), and AD-tract-bound (right). **C)** Significant difference in the proportion of pathway interaction between not-tract-bound and tract-bound was assessed using Chi-square test. The P-values were  $-\log_{10}$  transformed and are hierarchically clustered. Strongly interacting pathways are highlighted in dashed rectangles. Pathway labels at two levels (Pathway Types and Signaling Types) are also added on the heatmap. **D)** Significant difference in the proportion of pathway interaction between not-tract-bound and AD-tract-bound was assessed using Chi-square test. Same heatmap display options as C) is applied here.

**Additional File 1: Figure S4. Correlation between tract-specific measures in ADNI3.** The correlation between Volume, average tract length (Length), Axial Diffusivity (AxD), Radial Diffusivity (RD), Mean Diffusivity (MD), and Fractional Anisotropy (FA) were examined for each tract.

**Figure S1**

**A**

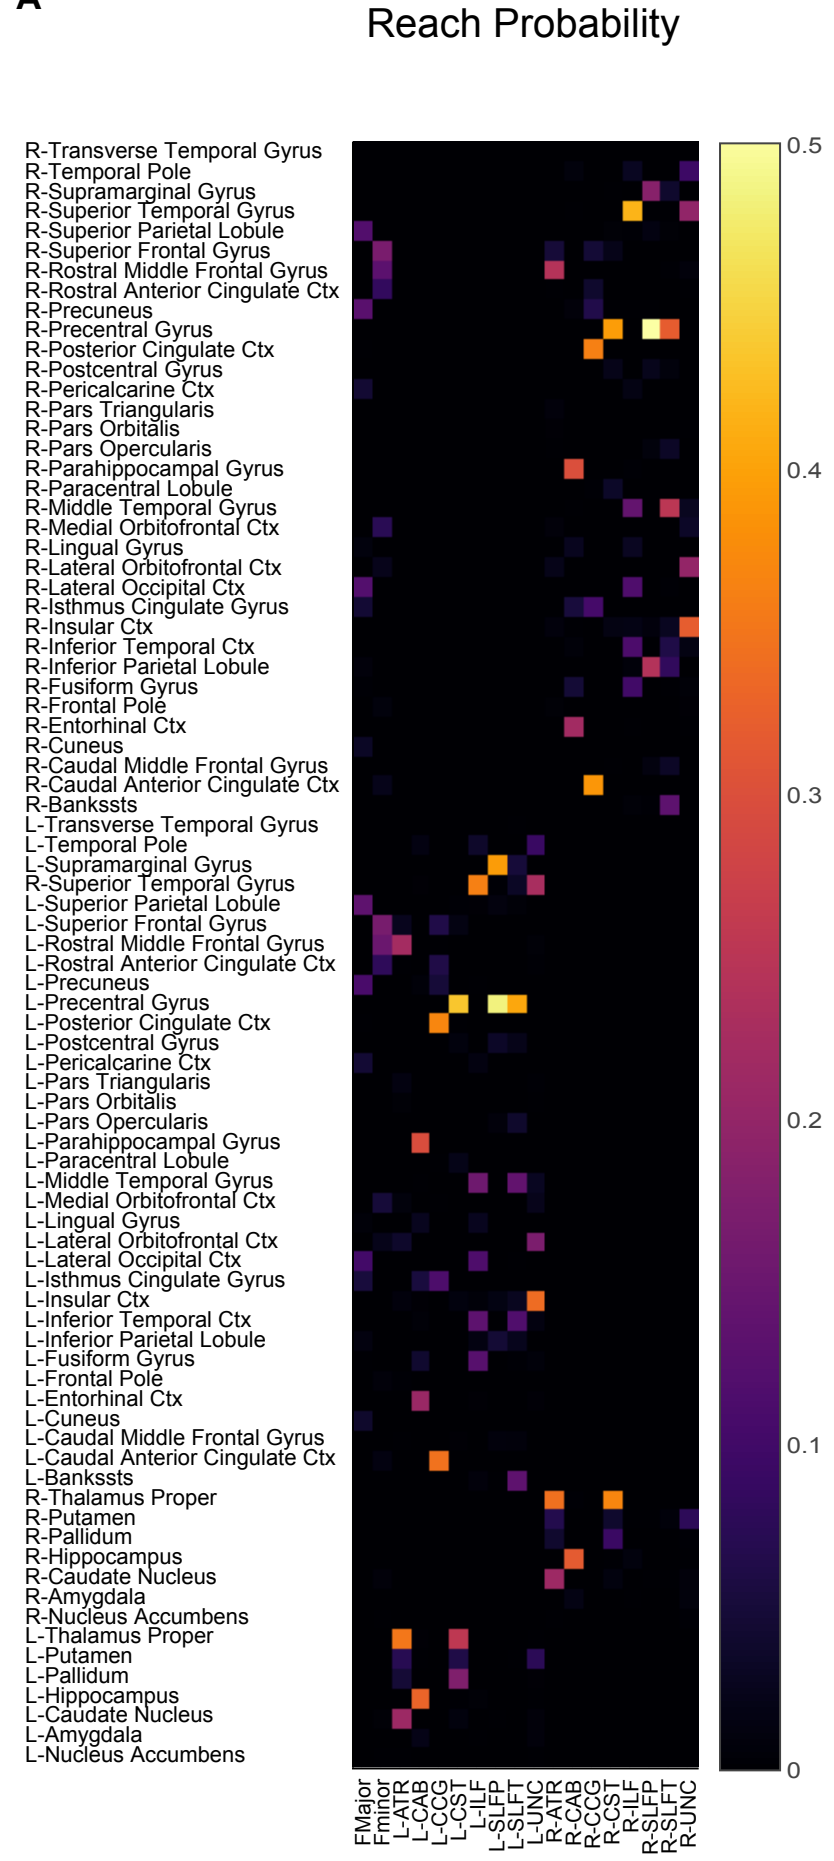

Bankssts: Banks of Superior Temporal Sulcus

**B**

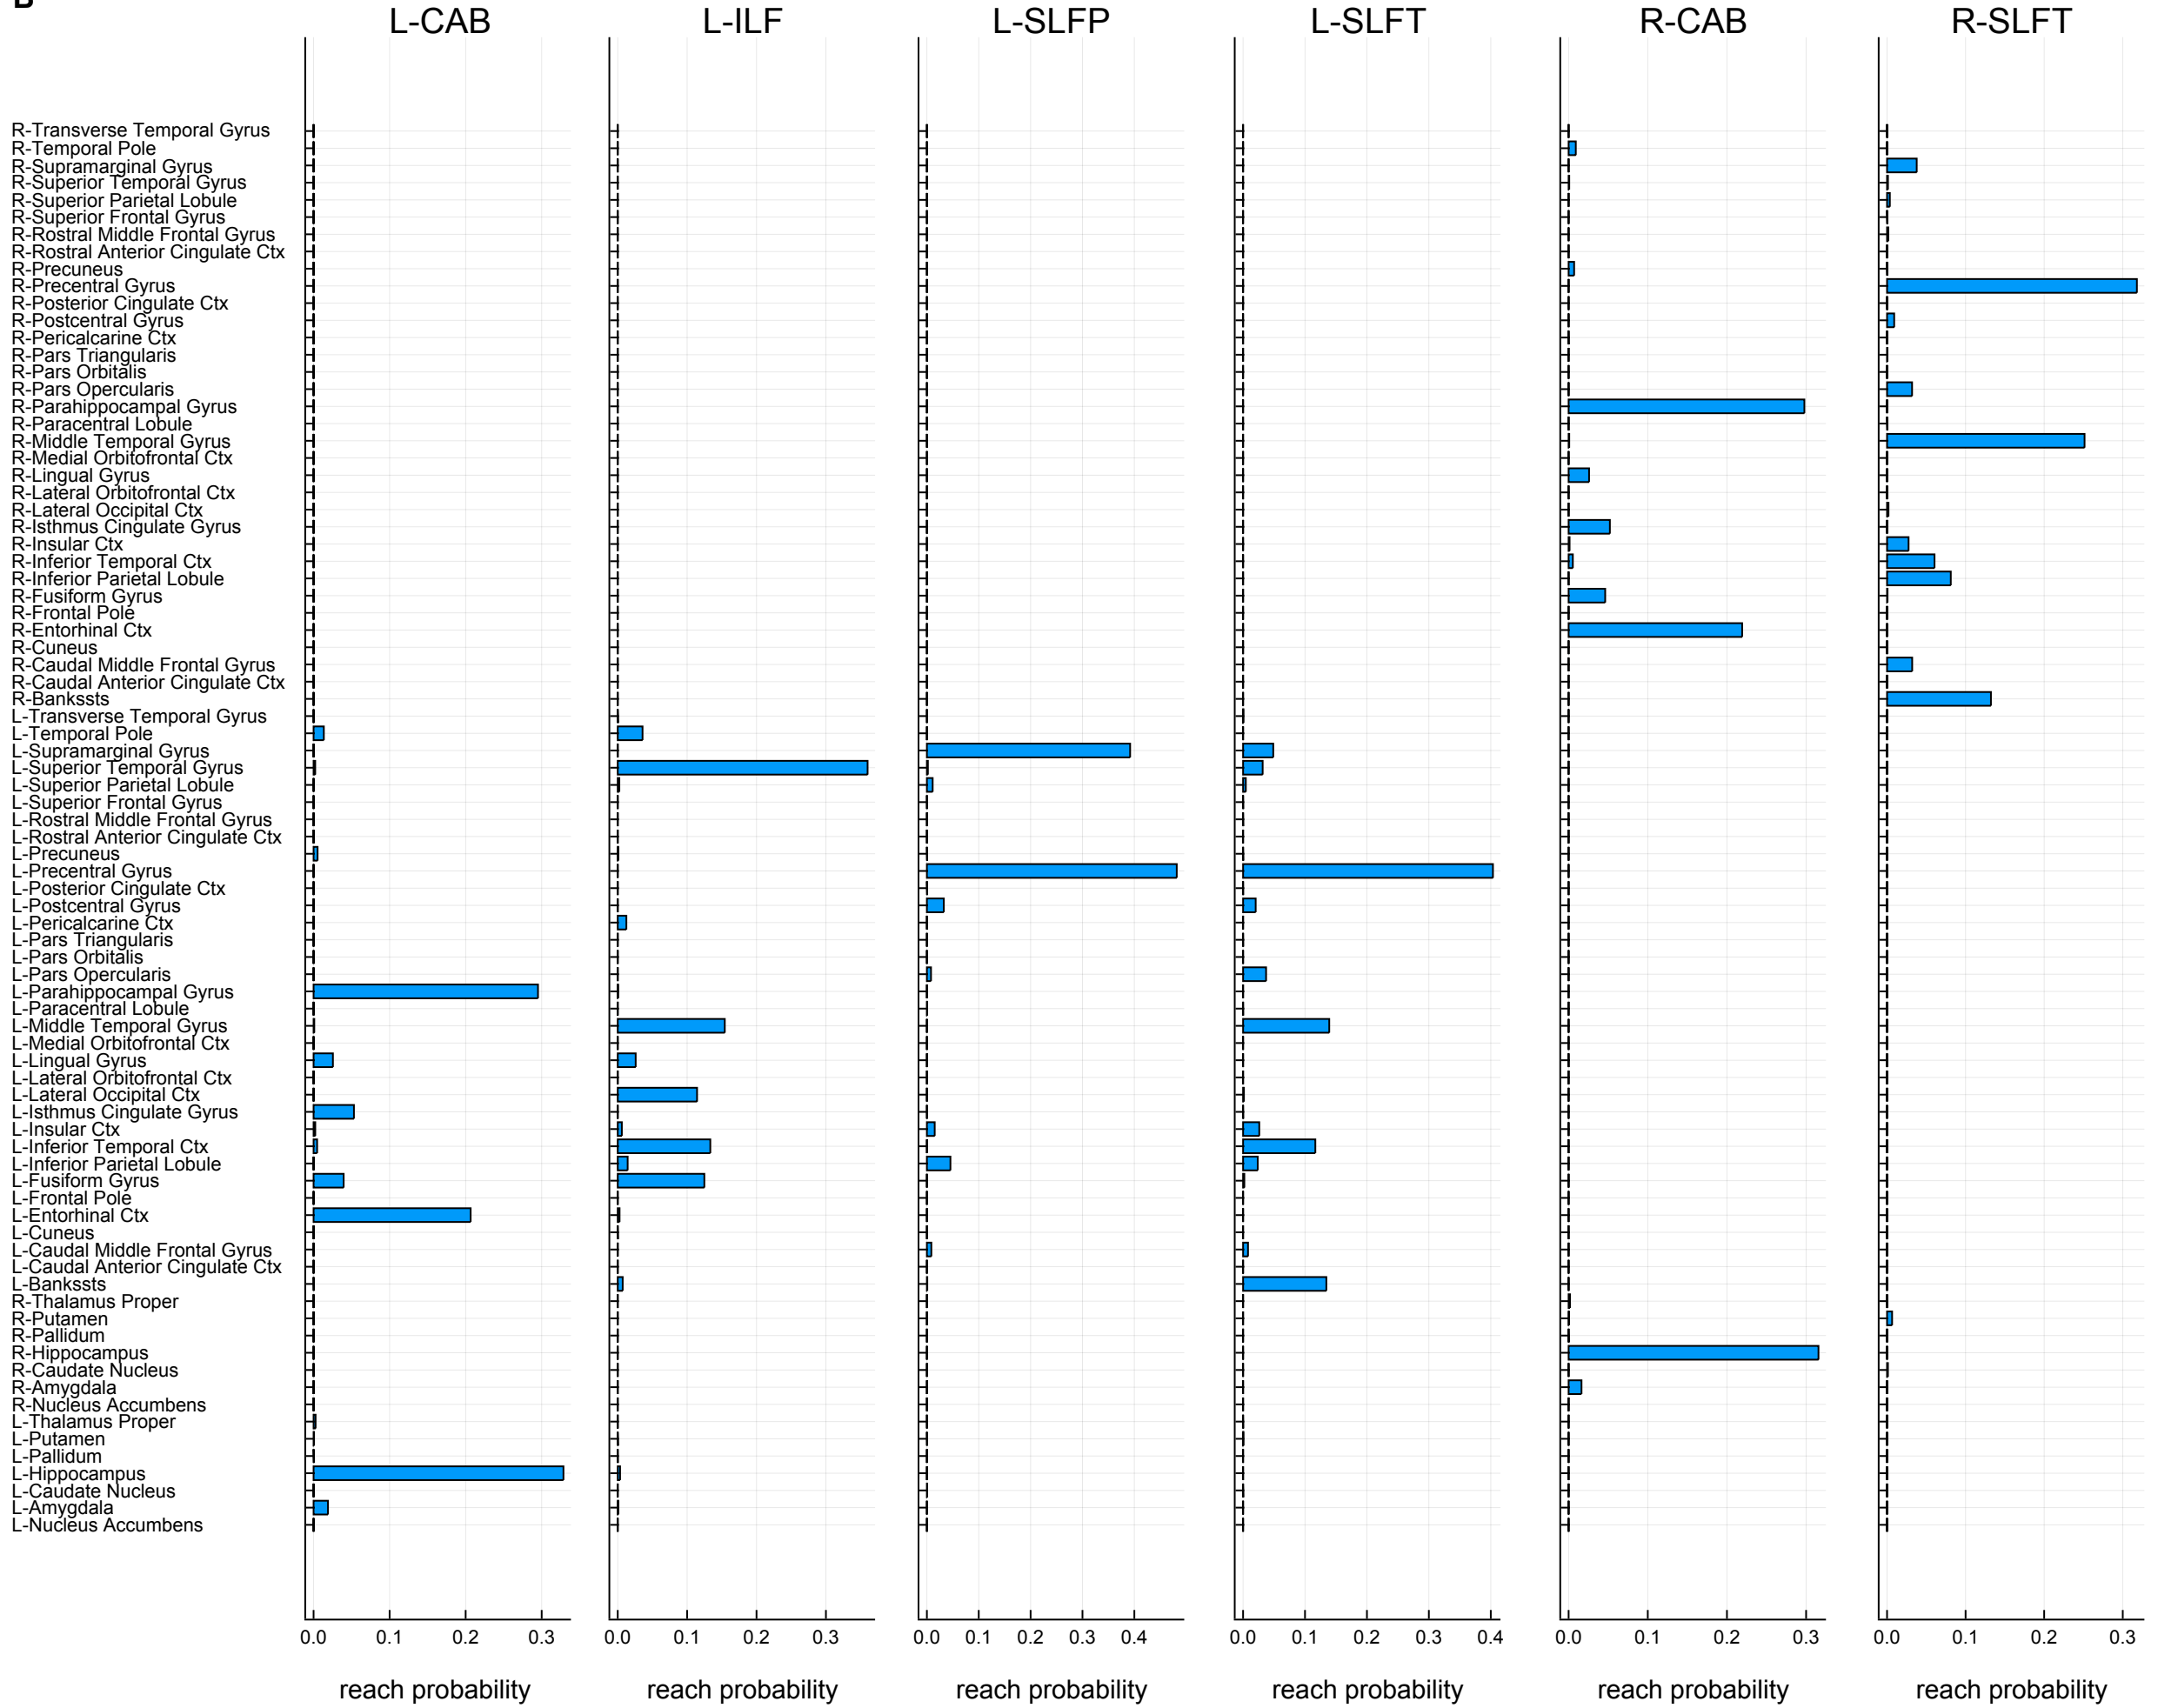

**Figure S2****A**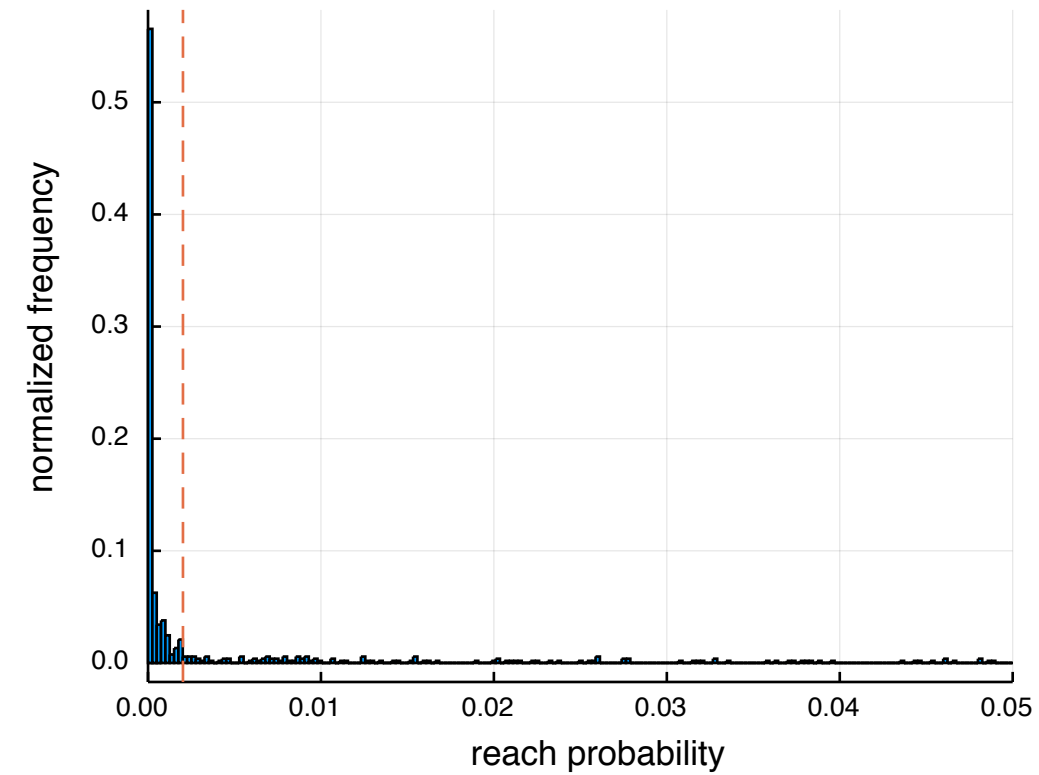**B**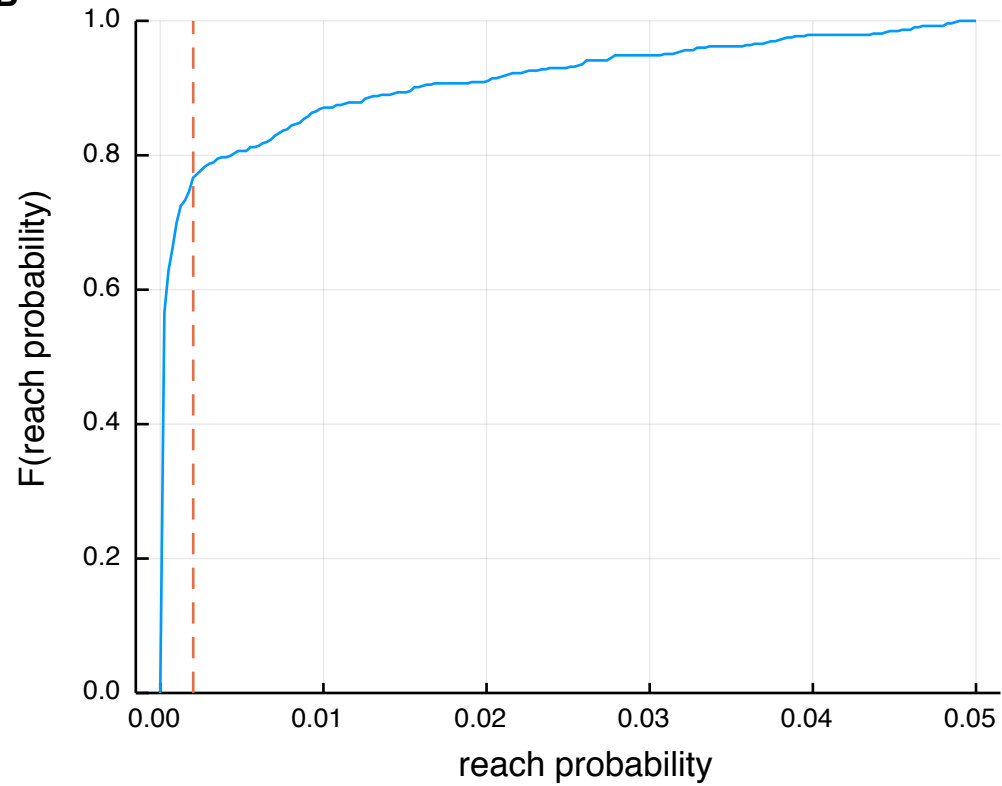

# Figure S3

**A**

| Pathway | ROI1 | ROI2 |  | p1 | p2 | p3 |   |
|---------|------|------|--|----|----|----|---|
| p1      | 0    | 1    |  | p1 | 0  | 0  | 0 |
| p2      | 1    | 1    |  | p2 | 1  | 1  | 1 |
| p3      | 1    | 1    |  | p3 | 1  | 1  | 1 |

$A_i$  = Adjacency matrix  
(Pathway interaction b/w ROIpairs)

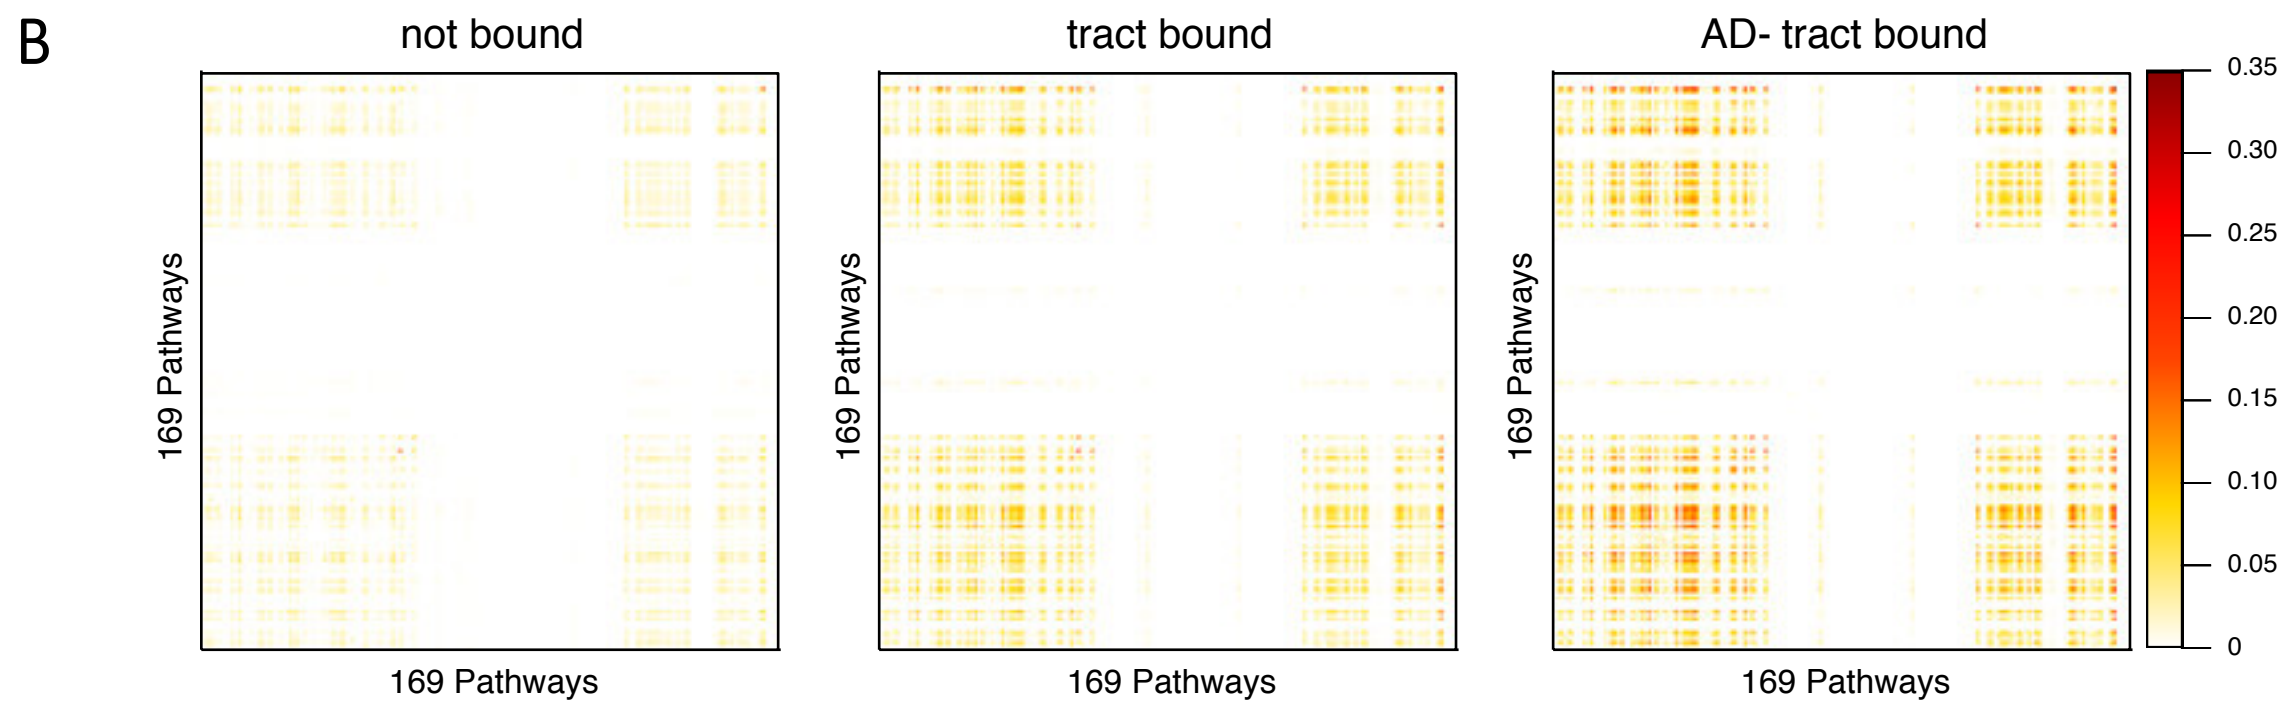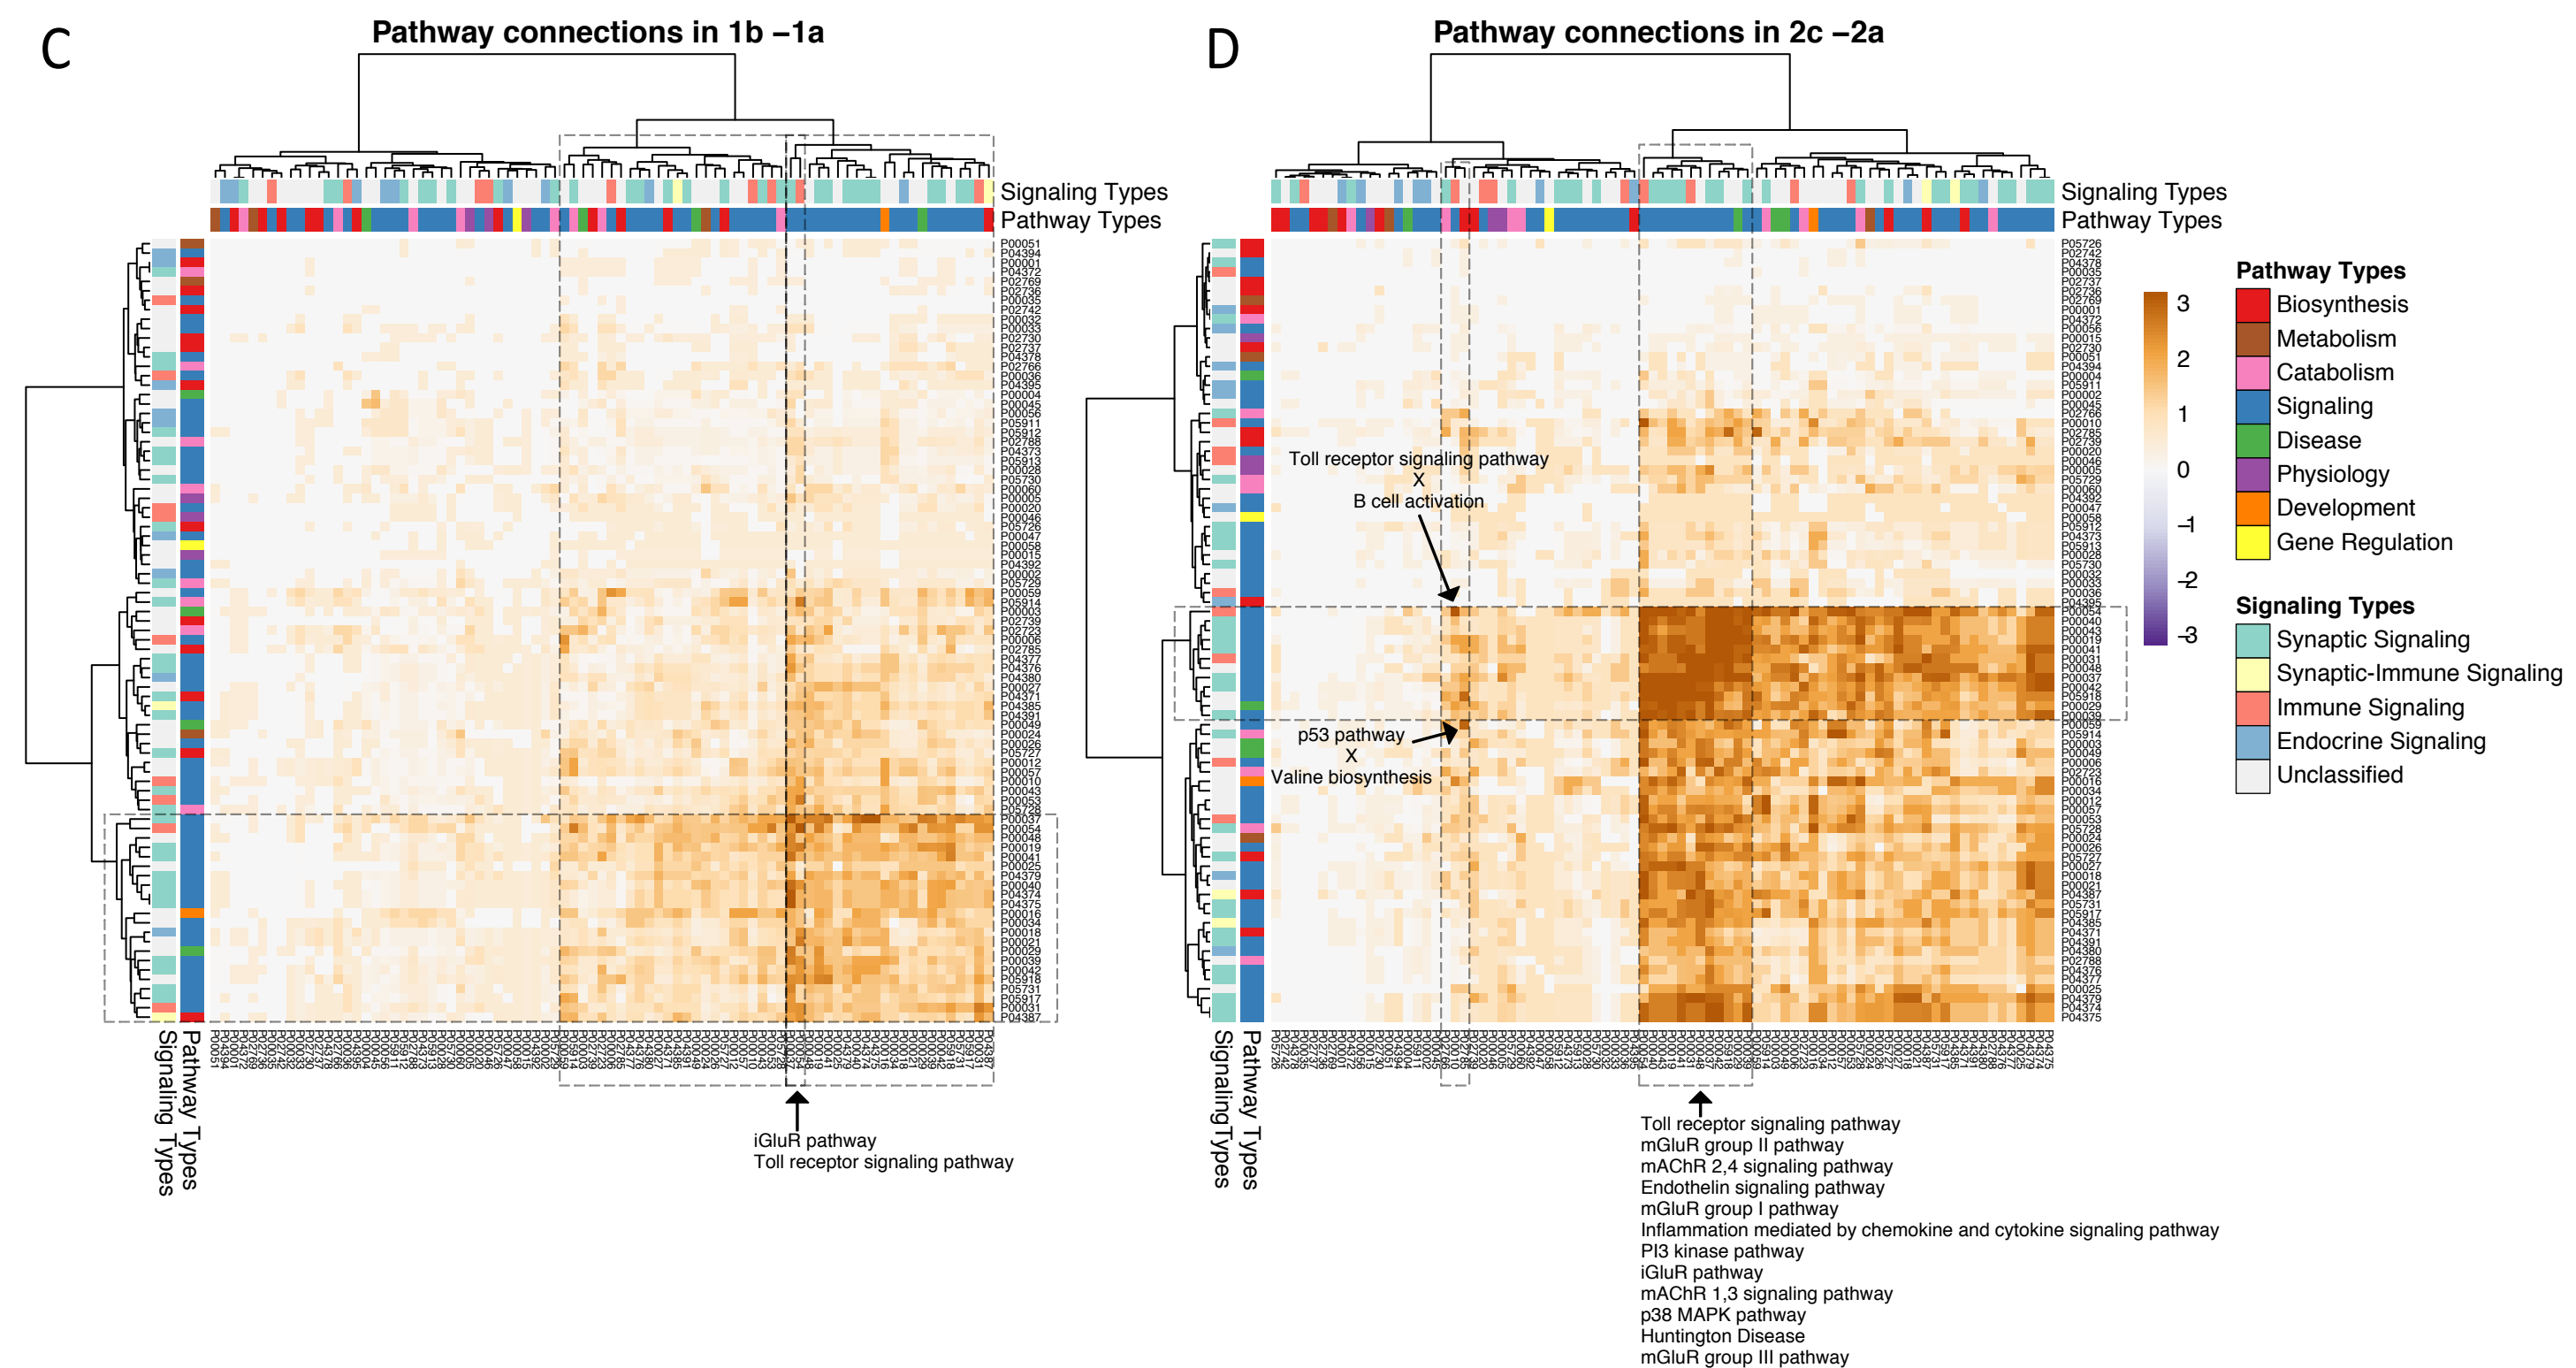

**Figure S4**

**Correlation between diffusion variables**

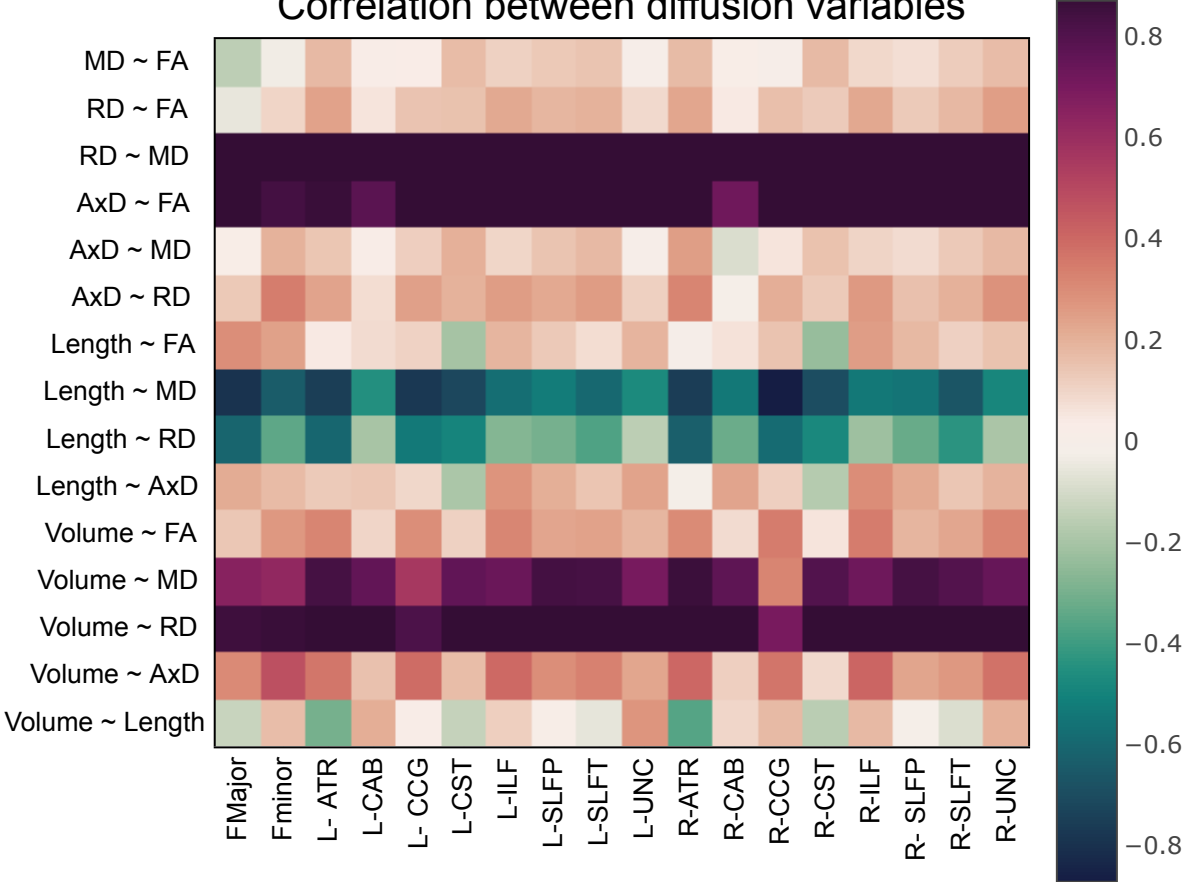

Supplement: MOESM1 [file 17661478]
